# Supplementary material
Source: HighWire-hosted journal article supplement (https://erj.ersjournals.com/content/56/1/2001751)
Supplement: inline-supplementary-material-1 [file inline-supplementary-material-1.pdf]

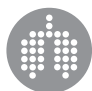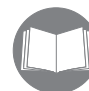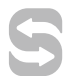

SHAREABLE PDF

# What is behind programmatic treatment outcome definitions for tuberculosis?

Zaza Avaliani<sup>1</sup>, Ogtay Gozalov<sup>2</sup>, Giorgi Kuchukhidze<sup>2</sup>, Alena Skrahina<sup>3</sup>, Viorel Soltan<sup>4</sup>, Martin van den Boom<sup>2</sup>, Irina Vasilyeva<sup>5</sup>, Valentina Vilc<sup>6</sup> and Askar Yedilbayev<sup>2</sup>

**Affiliations:** <sup>1</sup>National Center for Tuberculosis and Lung Diseases, Tbilisi, Georgia. <sup>2</sup>WHO Regional Office for Europe, Copenhagen, Denmark. <sup>3</sup>Republican Research and Practical Center for Pulmonology and Tuberculosis, Minsk, Belarus. <sup>4</sup>Stop TB Partnership, Geneva, Switzerland. <sup>5</sup>National Medical Research Center of Phthisiopulmonology and Infectious Diseases, Moscow, Russian Federation. <sup>6</sup>Institute of Phthisiopneumology, Chisinau, Republic of Moldova.

**Correspondence:** Askar Yedilbayevb, WHO Regional Office for Europe, UN City, Marmorvej 51, DK-2100 Copenhagen, Denmark. E-mail: yedilbayeva@who.int

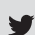

@ERSpublications

**Rationale for programmatic TB definitions in management of TB and MDR-TB** <https://bit.ly/36BYD2E>

**Cite this article as:** Avaliani Z, Gozalov O, Kuchukhidze G, *et al.* What is behind programmatic treatment outcome definitions for tuberculosis? *Eur Respir J* 2020; 56: 2001751 [<https://doi.org/10.1183/13993003.01751-2020>].

This single-page version can be shared freely online.

Following the launch of the DOTS (directly observed treatment, short-course) strategy in 1995, the World Health Organization (WHO) recommended the evaluation of treatment outcomes [1, 2]. The methodology and the forms for recording and reporting, in order to programmatically evaluate the proportion of tuberculosis (TB) cases achieving treatment success (“cured” and “treatment completed”; table 1) or dying, failing treatment and being lost to follow-up, were initially developed by Karel Styblo in the 1980s as part of the pilot programme of TB control in Tanzania [1, 2].
